# Supplementary material for: Comparative Transcriptomic Analysis Reveals the Immunosuppressive Targets of Mesalazine in Dextran Sulfate Sodium-Induced Ulcerative Colitis
Source: Front Genet. 2021 Aug 11;12:698983. doi: 10.3389/fgene.2021.698983 (PMC8386351; doi:10.3389/fgene.2021.698983)
Supplement: Supplementary file 7 [file Table_7.XLSX]

## Sheet: Sheet1
Sample	Raw Data		Valid Data		Valid Ratio(reads)	Q20%	Q30%	GC content%
	Read	Base (Gb)	Read	Base (Gb)
Ctrl_1	53176788	7.98	51703938	7.76	97.23	99.96	97.98	49.5
Ctrl_2	50155768	7.52	48764866	7.31	97.23	99.96	97.94	49
Ctrl_3	55552648	8.33	54347766	8.15	97.83	99.97	98.18	50
Ctrl_4	50735166	7.61	49696000	7.45	97.95	99.97	98.2	48.5
Ctrl_5	47113206	7.07	46060298	6.91	97.77	99.97	98.01	49
Dss_1	51378030	7.71	50340262	7.55	97.98	99.96	97.95	48.5
Dss_2	51794986	7.77	50620446	7.59	97.73	99.96	98.06	48.5
Dss_3	50965612	7.64	49932850	7.49	97.97	99.98	98.78	49
Dss_4	51197200	7.68	50142292	7.52	97.94	99.98	98.72	49
Dss_5	51281916	7.69	50198506	7.53	97.89	99.97	98.66	49.5
Dss + Mesalazine_1	49907066	7.49	48853522	7.33	97.89	99.97	98.13	49
Dss + Mesalazine_2	47760458	7.16	46903500	7.04	98.21	99.96	97.86	50
Dss + Mesalazine_3	48101686	7.22	46894200	7.03	97.49	99.96	98.05	49
Dss + Mesalazine_4	44183470	6.63	43217994	6.48	97.81	99.97	98.11	49
Dss + Mesalazine_5	47462612	7.12	46387314	6.96	97.73	99.97	98.04	49
